# Supplementary material
Source: PubMed Central journal article supplement (PMC5794014)
Supplement: NIHMS924772-supplement-supplement_1.pdf [file NIHMS924772-supplement-supplement_1.pdf]

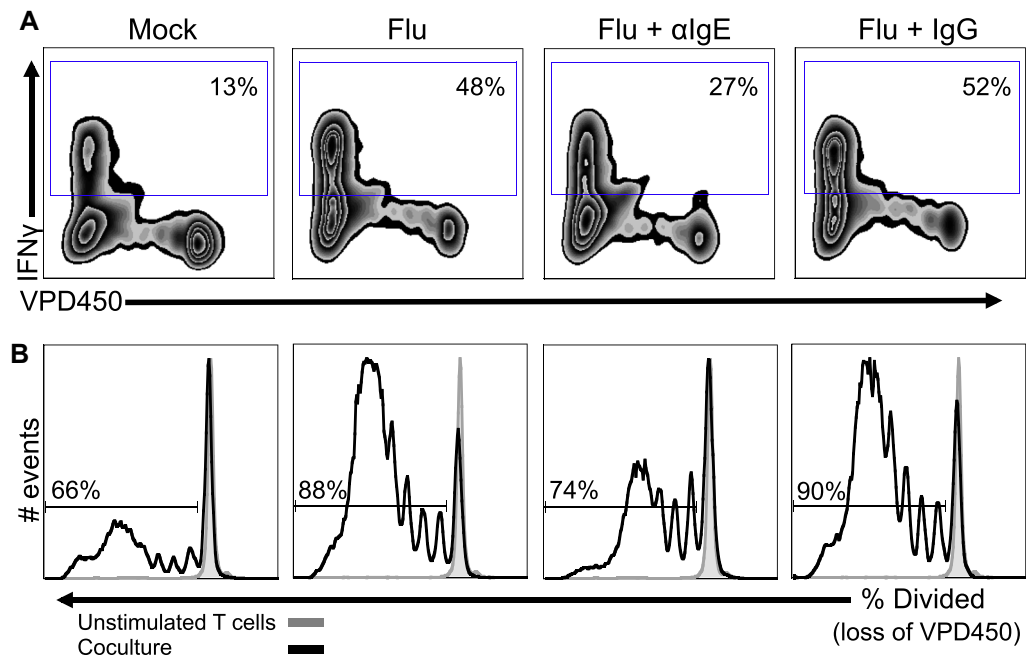

**FIG E1.** IgE cross-linking inhibits virus-driven monocyte T-cell priming and proliferation. Representative flow cytometry plots for Fig 1. Naive CD4 T cells polarized with monocytes exposed to no virus (mock) or influenza A virus (Flu)  $\pm$  IgE cross-linking antibody ( $\alpha$ IgE) or isotype IgG control. T cells were labeled with the cell proliferation dye, VPD450, before coculture. **A**, Zebra plots for IFN- $\gamma$  expression versus VPD450 show decreased IFN- $\gamma$ -positive cells in the presence of IgE cross-linking. **B**, Histograms show cell proliferation (measured by loss of VPD450 intensity, x-axis) of T cells stimulated with monocytes (black line) compared with unstimulated T cells in gray.

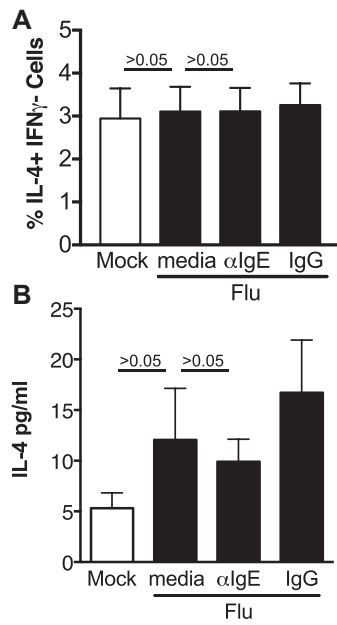

**FIG E2.** IgE cross-linking does not alter  $T_H2$  polarization. Naive CD4 T cells polarized with monocytes exposed to no virus (mock) or influenza A virus (Flu)  $\pm$  IgE cross-linking antibody ( $\alpha$ IgE) or isotype IgG control. Graphs shown are **(A)** mean percentages of IL-4+ IFN- $\gamma$ - cells for the indicated conditions. N = 15 donor pairs. **B**, Mean IL-4 concentration in monocyte-T-cell coculture supernatants. N = 5 donor pairs; error bars represent SEM, and P values represent results of 2-way ANOVA.

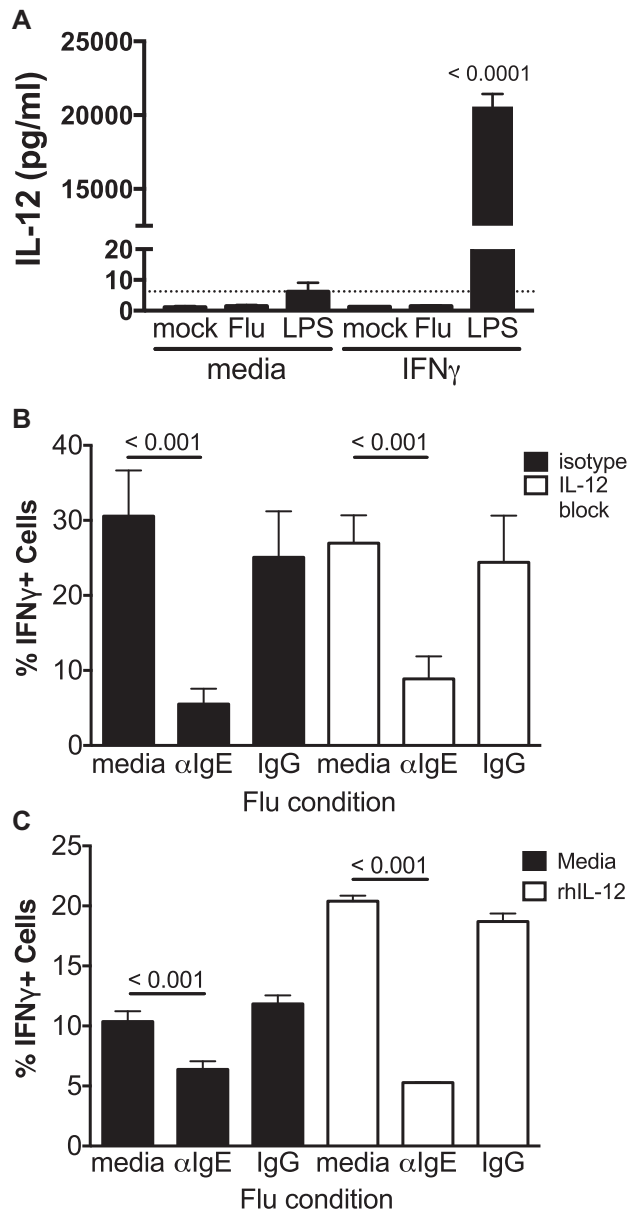

**FIG E3.** IL-12 is not involved in  $T_H1$  polarization by influenza-exposed monocytes. IL-12 is a critical factor in  $T_H1$  development.<sup>E21</sup> Neither blocking antibodies nor exogenous addition of IL-12 restored the IgE-mediated defect in  $T_H1$  differentiation. **A**, IL-12p70 production was measured in supernatants from monocytes treated  $\pm$  IFN- $\gamma$  for 18 hours followed by 24-hour incubation with media alone (mock), influenza A virus (Flu), or LPS. IL-12p70 was not detectable after influenza exposure, despite robust production under positive control conditions. Dashed line denotes the limit of detection. **B**, Monocyte-induced  $T_H1$  priming; mean % IFN- $\gamma$ + T cells in depicted conditions treated  $\pm$  isotype control (black bars) or neutralizing IL-12 antibody (white bars). N = 3. **C**, % IFN- $\gamma$ + T cells  $\pm$  rh IL-12. Representative data (of N = 3 experiments) is shown; error bars represent SEM and P values represent results of 1-way ANOVA.

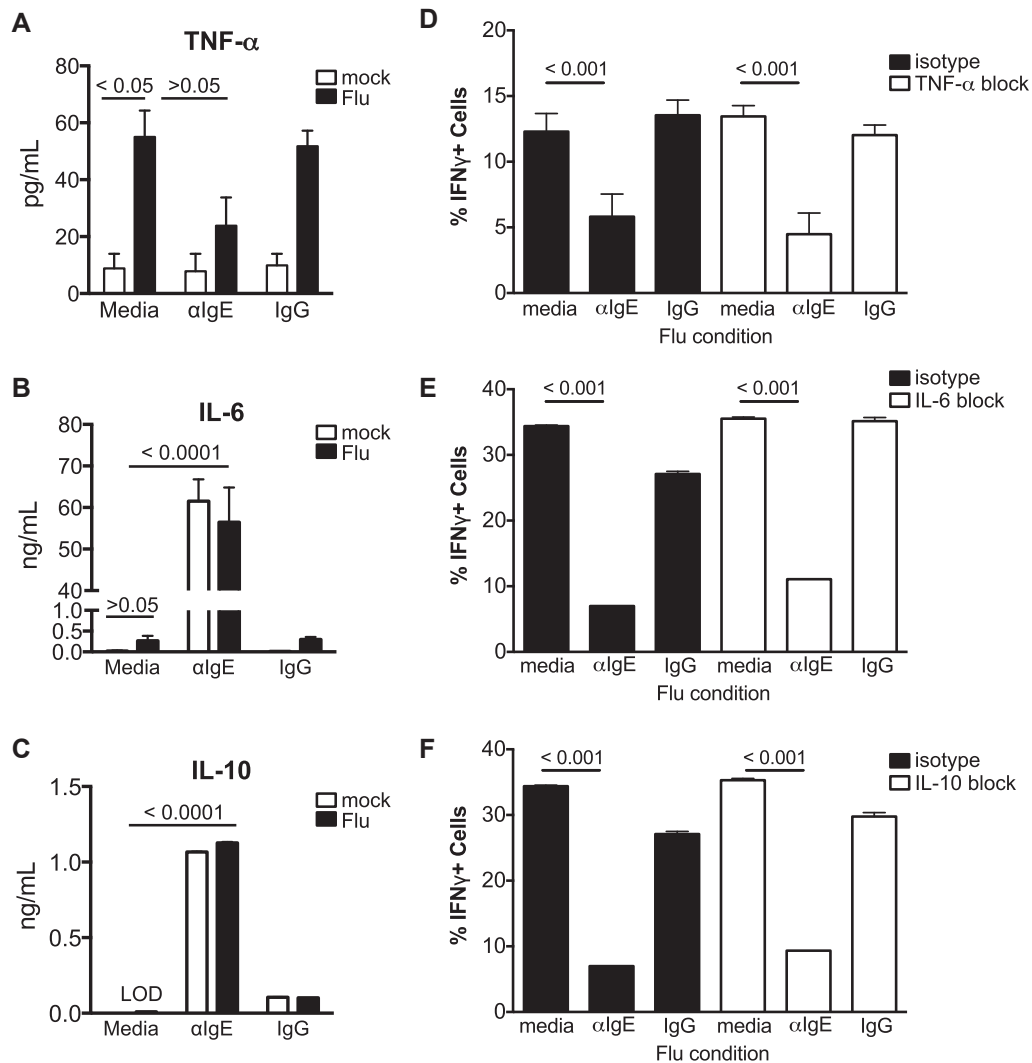

**FIG E4.** IgE cross-linking suppresses  $T_H1$  priming independently of TNF- $\alpha$ , IL-6, and IL-10. Cytokine secretion from monocyte supernatants at 18 hours after influenza virus (Flu)  $\pm$  IgE cross-linking was measured for (A) TNF- $\alpha$ , (B) IL-6, or (C) IL-10. These were secreted by monocytes upon IgE cross-linking,<sup>7</sup> and in the presence of both IgE cross-linking and influenza. D-F, Neutralization of these cytokines did not impact influenza-induced  $T_H1$  priming or restore inhibition by IgE cross-linking. Mean percentages of IFN- $\gamma$ + T cells in monocyte-T-cell cocultures treated with isotype controls (black bars) or neutralizing antibodies (white bars) to (Fig E4, D) TNF- $\alpha$ , (Fig E4, E) IL-6, or (Fig E4, F) IL-10. Representative data from  $N = 3$  experiments are shown; error bars represent SEM, and  $P$  values represent results of 1-way ANOVA.

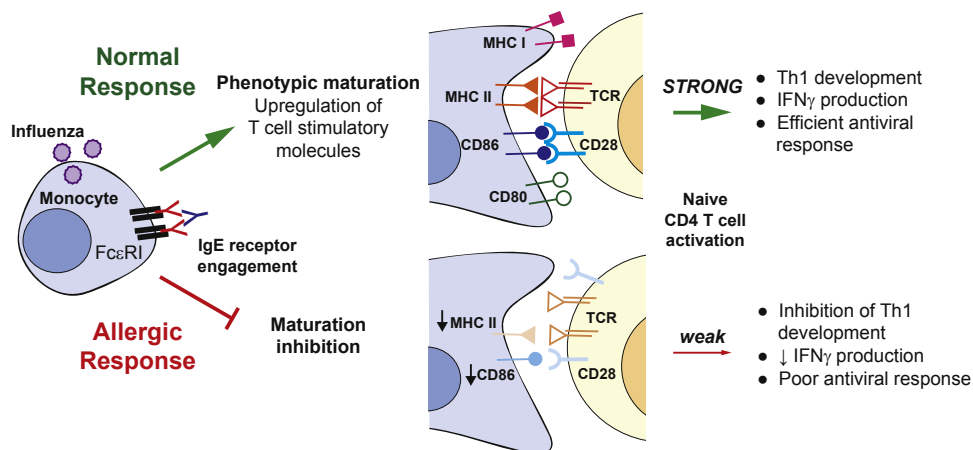

**FIG E5.** Model of IgE-mediated inhibition of monocyte-driven  $T_H1$  priming. Upon monocyte influenza exposure, the normal antiviral response results in phenotypic maturation and upregulation of monocyte cell surface molecules, downstream antigen presentation, and strong TCR signal culminating in  $T_H1$  differentiation. In the setting of allergic stimulation, via IgE receptor ( $Fc\epsilon R1$ ) engagement, virus-induced monocyte maturation is inhibited, resulting in weak TCR signal and poor  $T_H1$  differentiation. Impaired  $T_H1$  production would have significant downstream effects, including decreased antiviral cytokine secretion (eg,  $IFN-\gamma$ ), cytotoxic  $CD8^+$  T-cell development, and antigen-specific antibody production.

**TABLE E1.** Influenza virus associations with allergic disease

- Influenza viruses are associated with severe disease in individuals with allergic asthma, and have been linked to exacerbations.<sup>E4-E6</sup>
- During the 2009 influenza pandemic, increased disease severity was observed in patients with asthma, with many requiring intensive level care.<sup>E7,E8</sup>
- However, other comorbidities besides asthma have higher rates of severe outcomes, including death, among hospitalized individuals with influenza.<sup>E9-E11</sup>
- The Centers for Disease Control and Prevention reports that asthma is the most common underlying comorbidity in children and in the top 5 for adults hospitalized with influenza.<sup>E12</sup>
- More severe infections have been noted in atopic vs nonatopic children in general.<sup>E13</sup>
- Influenza is also isolated more frequently from adults with allergic rhinitis compared with healthy controls.<sup>E14</sup>
- Murine models of allergic sensitization demonstrate enhanced allergic phenotypes after influenza infection.<sup>E15,E16</sup>

Investigating IgE-mediated effects on antiviral immune responses to influenza virus may shed light on key mechanisms modulating allergen-virus interactions.
